# Supplementary material for: RAS-mutant leukaemia stem cells drive clinical resistance to venetoclax
Source: PubMed Central journal article supplement — Nature. 2024 Oct 30;636(8041):241–50. doi: 10.1038/s41586-024-08137-x (PMC11618090; doi:10.1038/s41586-024-08137-x), 2024-10-30
Supplement: 41586_2024_8137_MOESM1_ESM.pdf [file 41586_2024_8137_MOESM1_ESM.pdf]

---

**Supplementary information**

---

**RAS-mutant leukaemia stem cells drive clinical resistance to venetoclax**

---

In the format provided by the authors and unedited

## **RAS-mutant leukaemia stem cells drive clinical resistance to venetoclax**

**Junya Sango<sup>1,2,3,4,5§</sup>, Saul Carcamo<sup>1,2,3,4,5,6§</sup>, Maria Sirenko<sup>7,8§</sup>, Abhishek Maiti<sup>9§</sup>, Hager Mansour<sup>1,2,3,4,5</sup>, Gulay Ulukaya<sup>1,2,3,4,5,6</sup>, Lewis E Tomalin<sup>2,3,4,5,6</sup>, Nataly Cruz-Rodriguez<sup>1,2,3,4,5</sup>, Tiansu Wang<sup>1,2,3,4,5</sup>, Malgorzata Olszewska<sup>1,2,3,4,5</sup>, Emmanuel Olivier<sup>1,2,3,4,5</sup>, Manon Jaud<sup>1,2,3,4,5</sup>, Bettina Nadorp<sup>10,11</sup>, Benjamin Kroger<sup>12,13</sup>, Feng Hu<sup>14</sup>, Lewis Silverman<sup>2,4,5</sup>, Stephen S Chung<sup>12,15</sup>, Elvin Wagenblast<sup>1,2,3,5</sup>, Ronan Chaligne<sup>16,17</sup>, Ann-Kathrin Eisfeld<sup>18</sup>, Deniz Demircioglu<sup>1,2,5,6</sup>, Dan A Landau<sup>16,17</sup>, Piro Lito<sup>14</sup>, Elli Papaemmanuil<sup>7</sup>, Courtney D DiNardo<sup>9</sup>, Dan Hasson<sup>1,2,3,5,6</sup>, Marina Konopleva<sup>19-21</sup>, Eirini P Papapetrou<sup>1,2,3,4,5\*</sup>**

<sup>1</sup>Department of Oncological Sciences, Icahn School of Medicine at Mount Sinai, New York, NY, USA; <sup>2</sup>Tisch Cancer Institute, Icahn School of Medicine at Mount Sinai, New York, NY, USA; <sup>3</sup>Black Family Stem Cell Institute, Icahn School of Medicine at Mount Sinai, New York, NY, USA; <sup>4</sup>Department of Medicine, Icahn School of Medicine at Mount Sinai, New York, NY, USA; <sup>5</sup>Center for Advancement of Blood Cancer Therapies, Icahn School of Medicine at Mount Sinai, New York, NY, USA; <sup>6</sup>Bioinformatics for Next Generation Sequencing Shared Resource Facility, Tisch Cancer Institute, Icahn School of Medicine at Mount Sinai, New York, NY, USA; <sup>7</sup>Department of Epidemiology and Biostatistics, Memorial Sloan Kettering Cancer Center, New York, NY, USA; <sup>8</sup>Louis V. Gerstner Jr Graduate School of Biomedical Sciences, Memorial Sloan Kettering Cancer Center, New York, NY, USA; <sup>9</sup>Department of Leukemia, The University of Texas MD Anderson Cancer Center, Houston, TX, USA; <sup>10</sup>Division of Precision Medicine, Department of Medicine, NYU Grossman School of Medicine, New York, USA; <sup>11</sup>Department of Pathology, NYU Grossman School of Medicine, New York, NY, USA; <sup>12</sup>Department of Internal Medicine, University of Texas Southwestern Medical Center, Dallas, TX, USA; <sup>13</sup>Medical Scientist Training Program, University of Texas Southwestern Medical Center, Dallas, TX, USA; <sup>14</sup>Department of Medicine, Memorial Sloan Kettering Cancer Center, New York, NY 10065, USA; <sup>15</sup>Children's Medical Center Research Institute, University of Texas Southwestern Medical Center, Dallas, TX, USA; <sup>16</sup>Meyer Cancer Center, Weill Cornell Medicine, New York, NY, USA; <sup>17</sup>New York Genome Center, New York, NY, USA; <sup>18</sup>Clara D. Bloomfield Center for Leukemia Outcomes Research, The Ohio State University Comprehensive Cancer Center, Columbus, OH, USA; <sup>19</sup>Department of Medicine (Oncology), Albert Einstein College of Medicine, Bronx, NY, USA; <sup>20</sup>Department of Molecular Pharmacology, Albert Einstein College of Medicine, Bronx, NY, USA; <sup>21</sup>Montefiore Einstein Comprehensive Cancer Center, Bronx, NY, USA

§These authors contributed equally

\*Correspondence:

Eirini P Papapetrou, MD, PhD  
Icahn School of Medicine at Mount Sinai  
One Gustave L. Levy Place  
Box 1044A  
New York, NY 10029  
Phone: 212-824-9337  
Fax: 646-537-9576  
[eirini.papapetrou@mssm.edu](mailto:eirini.papapetrou@mssm.edu)

## **Table of contents**

Supplementary Fig. 1

Supplementary Fig. 2

Supplementary Fig. 3

Supplementary Fig. 4

Supplementary Table 1.

Supplementary Table 5.

Supplementary Table 6.

Supplementary Discussion

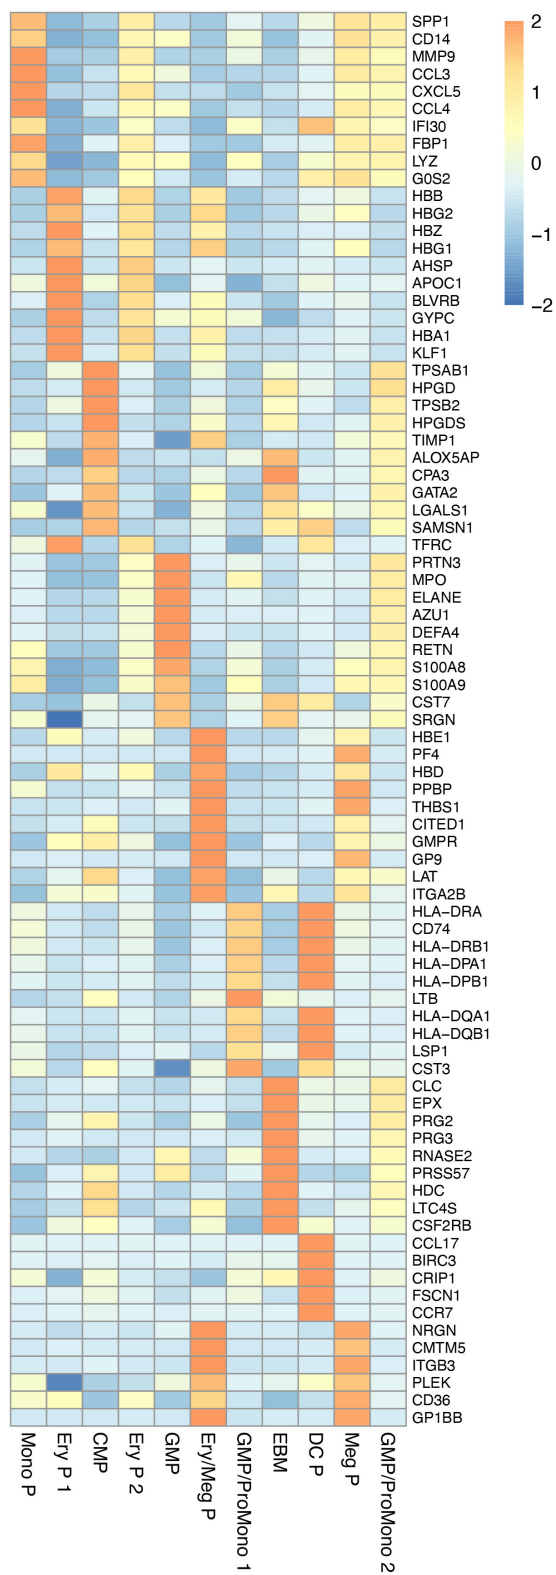

**Supplementary Fig. 1.** Heatmap showing the top 10 differentially expressed genes for each cluster (aggregated cell expression) of the single-cell transcriptome data shown in Fig. 2b in UMAP representation.

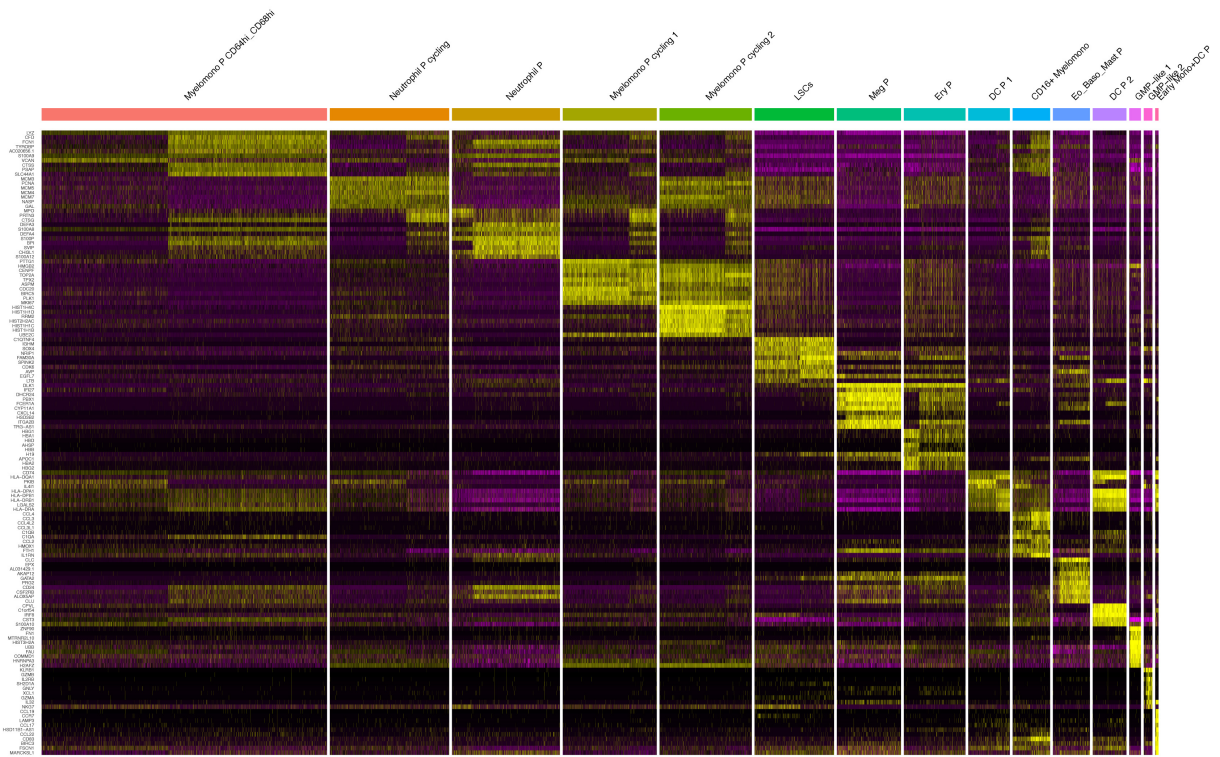

**Supplementary Fig. 2.** Heatmap showing the top 10 differentially expressed genes for each cluster of the single-cell transcriptome data shown in Fig. 3b and Extended Data Fig. 7a in UMAP representation.

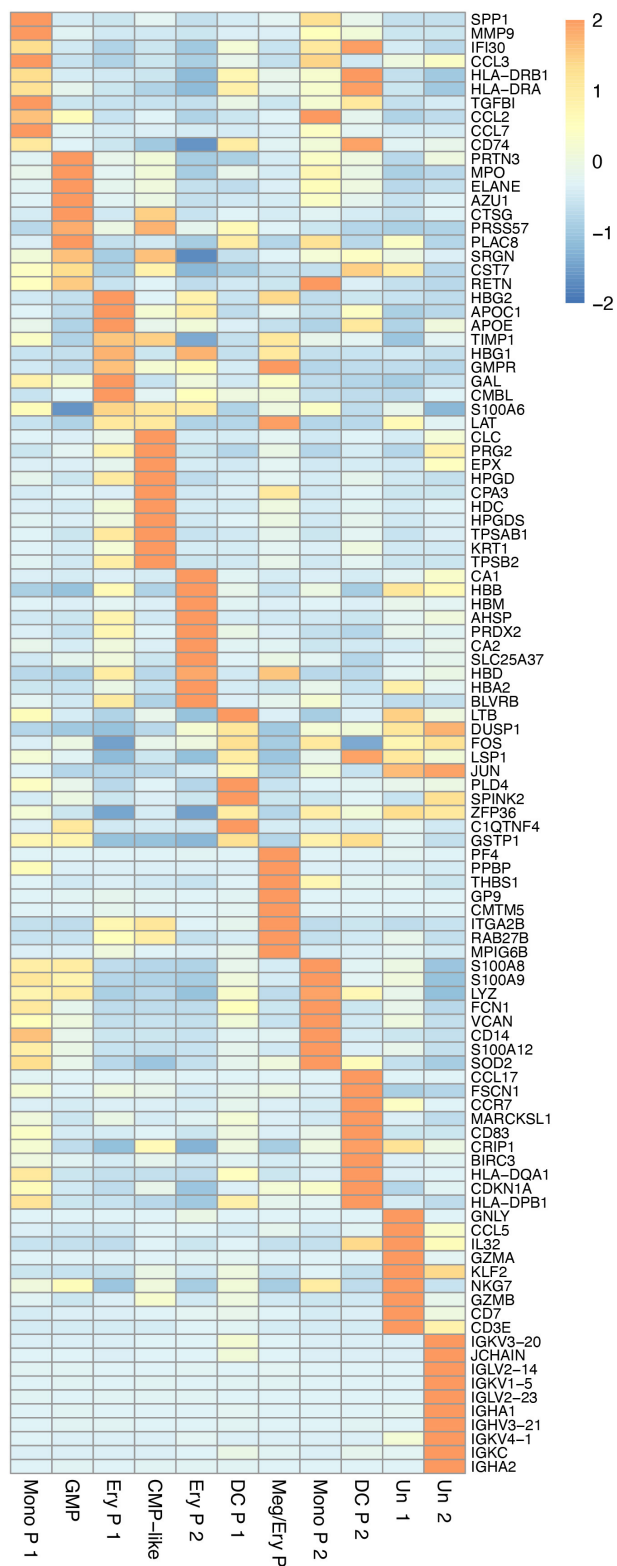

**Supplementary Fig. 3.** Heatmap showing the top 10 differentially expressed genes for each cluster (aggregated cell expression) of the single-cell transcriptome data shown in Fig. 5b in UMAP representation.

**Supplementary Fig. 4.** Uncropped Western blots. Samples were run on separate gels.

Fig. 5g AML-47.1

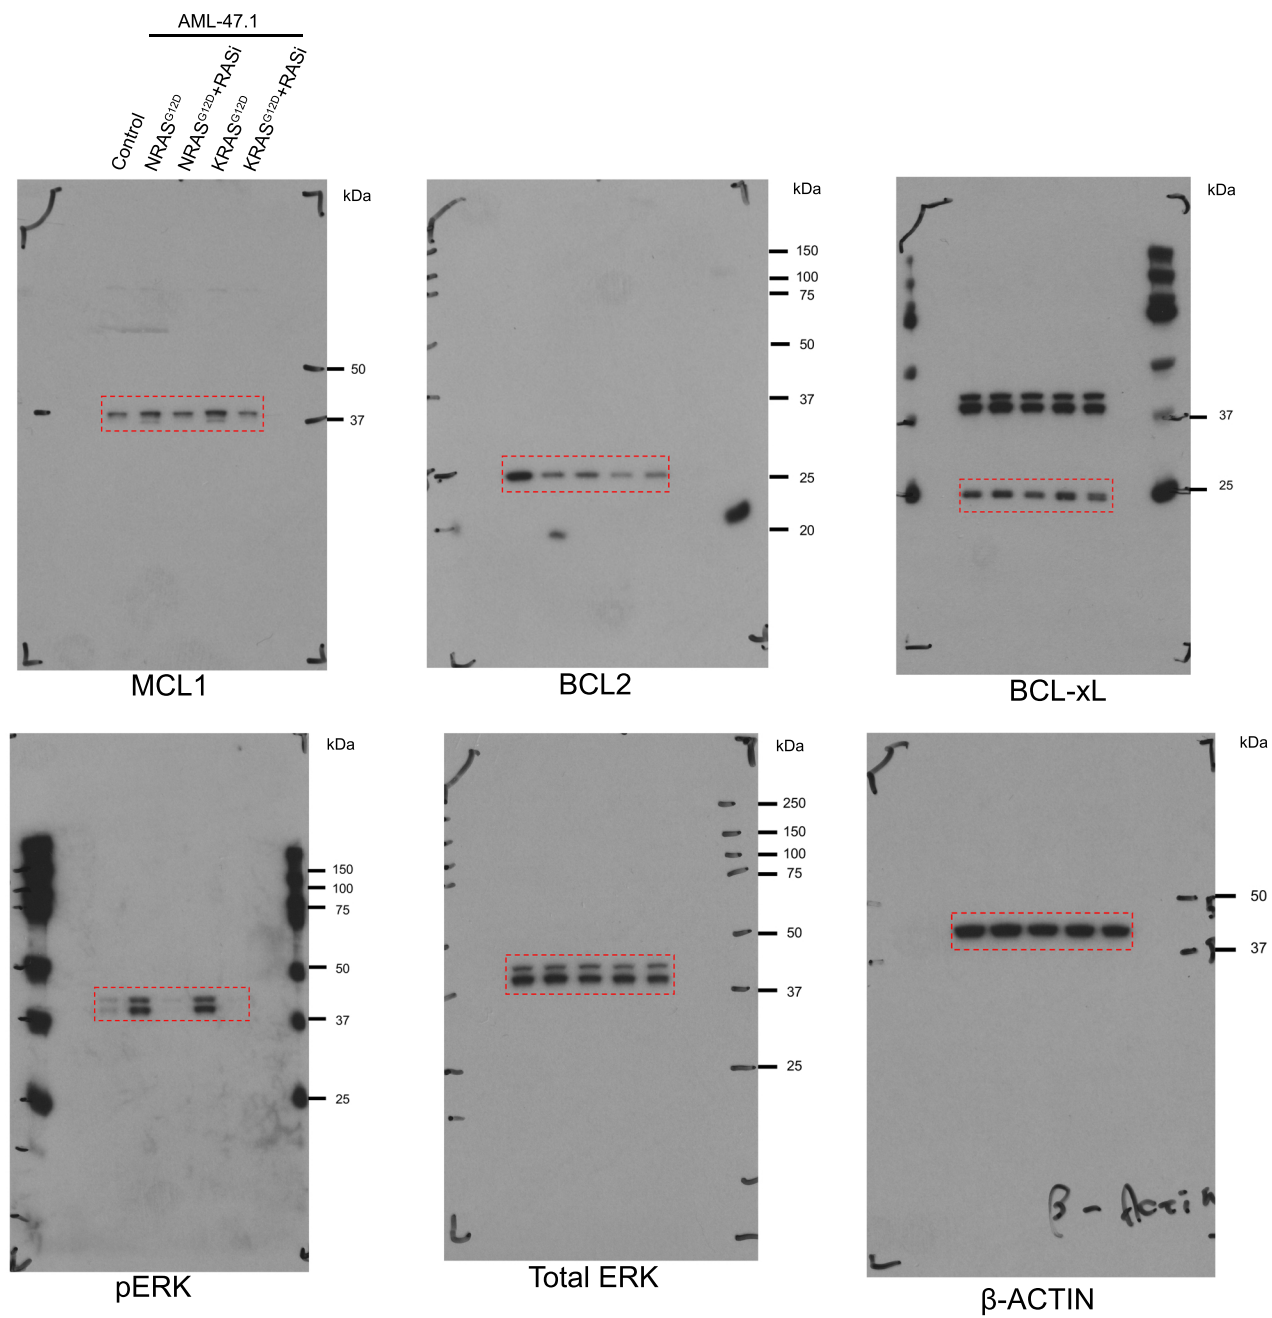



Fig. 5g AML-37.16, AML-4.24, AML-9.9

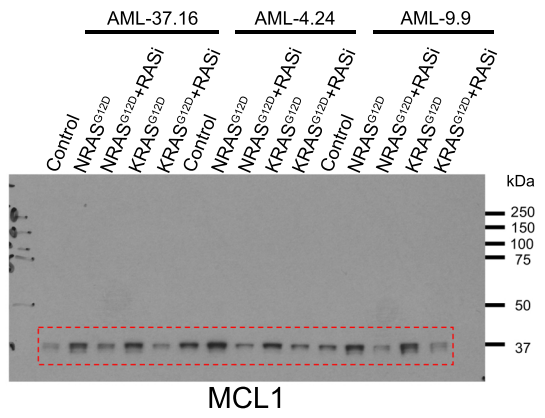

MCL1

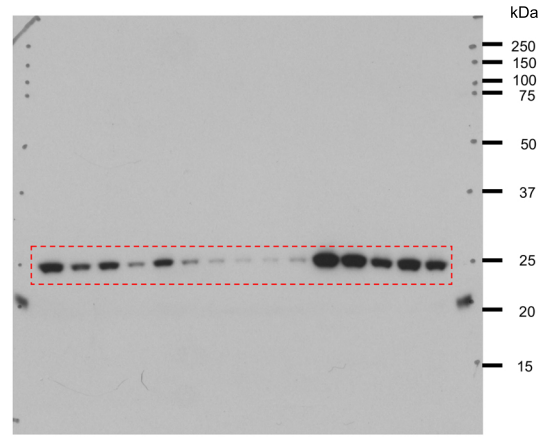

BCL2

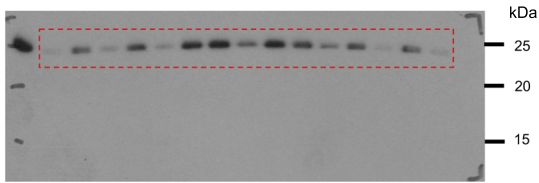

BCL-xL

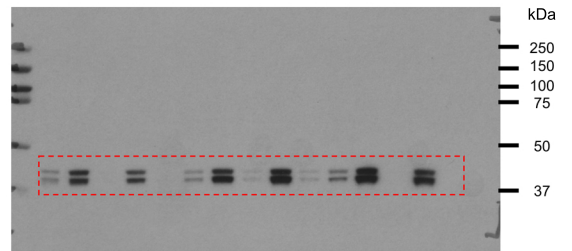

pERK

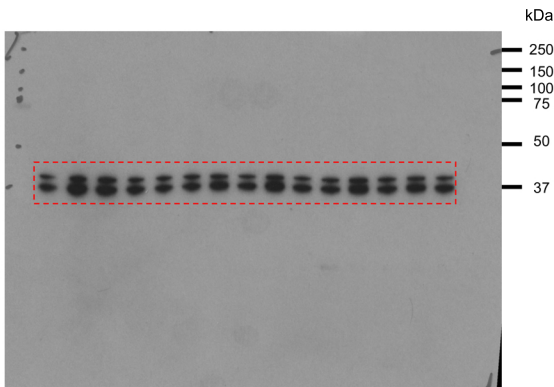

Total ERK

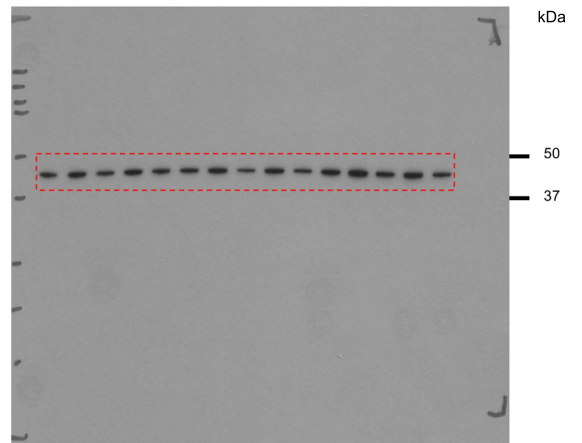

β-ACTIN

Extended Data Fig. 6b

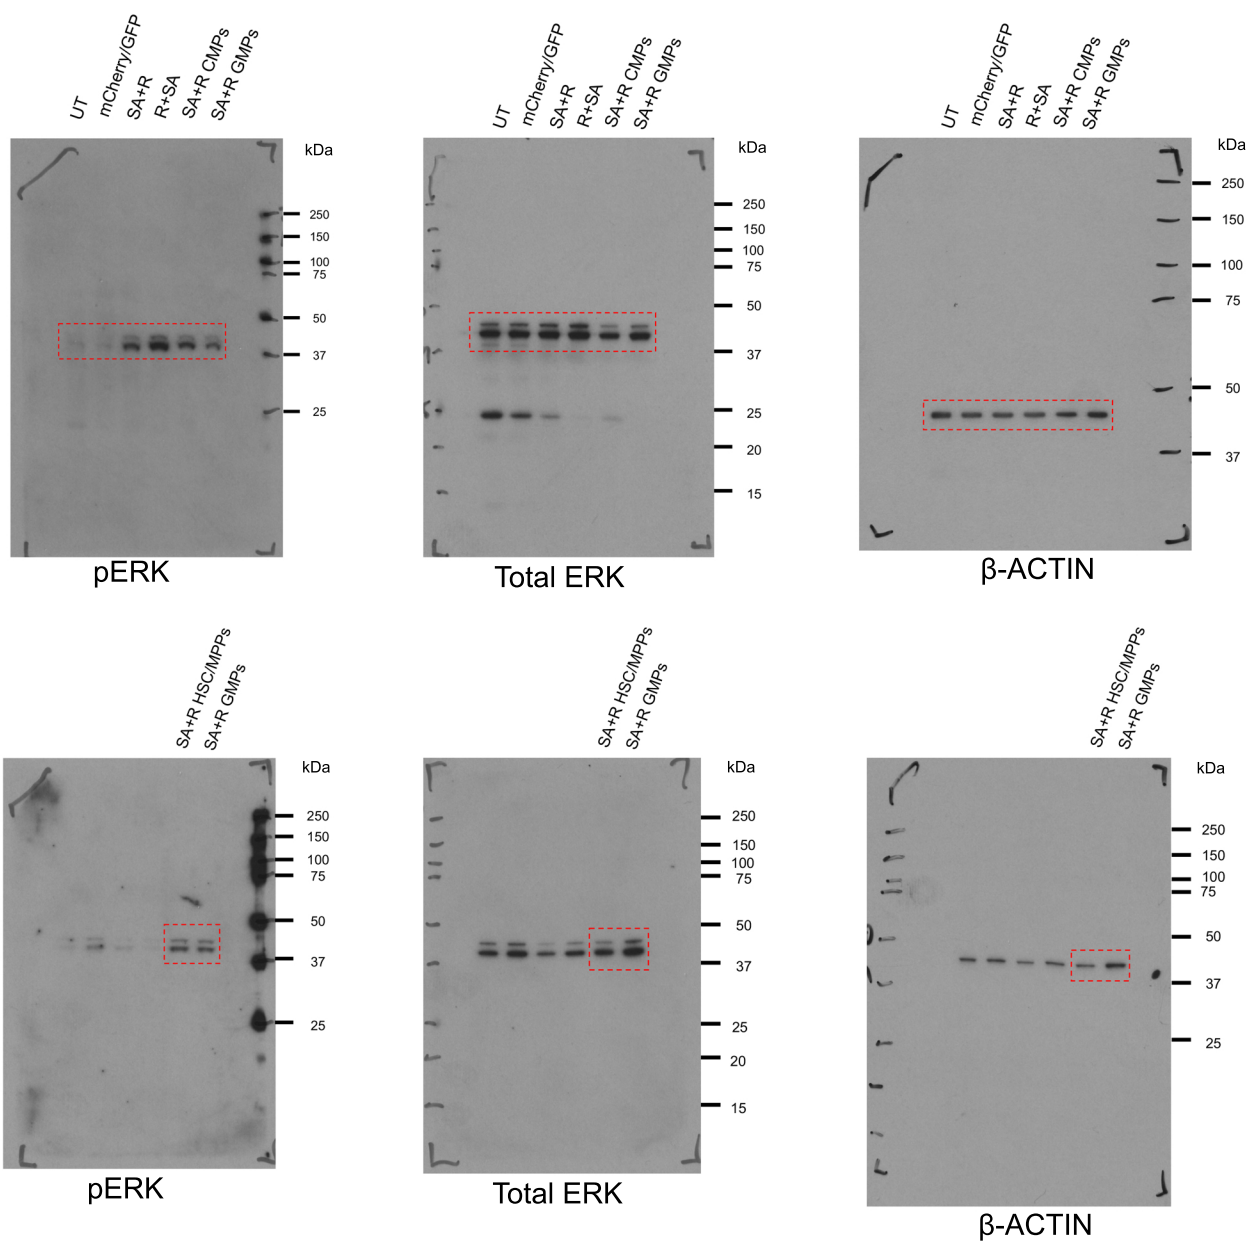

| Model | Figures in manuscript                                                                                     | Leukemic features                                                    |                                                                                                                                                                                                                                      |                                                                                                                                                                                                                |                                                                                                                                                              |                                                         |
|-------|-----------------------------------------------------------------------------------------------------------|----------------------------------------------------------------------|--------------------------------------------------------------------------------------------------------------------------------------------------------------------------------------------------------------------------------------|----------------------------------------------------------------------------------------------------------------------------------------------------------------------------------------------------------------|--------------------------------------------------------------------------------------------------------------------------------------------------------------|---------------------------------------------------------|
|       |                                                                                                           | Required                                                             |                                                                                                                                                                                                                                      | Additional                                                                                                                                                                                                     |                                                                                                                                                              |                                                         |
|       |                                                                                                           | Engraftment of myeloid-restricted immature human cells               | Engrafted cells harbor AML driver mutations                                                                                                                                                                                          | Engraftment is initiated by an HSPC population that should not normally show durable engraftment                                                                                                               | Lethal disease                                                                                                                                               |                                                         |
| #1    | <b>CD34+ HSPCs derived from genetically engineered iPSCs</b>                                              | Fig. 1a, b and Extended Data Fig. 1 and 2                            | Up to ~10% hCD45+ BM engraftment 13-15 weeks post-transplantation of exclusively CD33+ cells with immature (blast) morphology (Fig. 1b, Extended Data Fig. 1h-j, Extended Data Fig. 2e, i and previously reported in PMID: 33571445) | HSPCs derived from clonal triple mutant (SAR) iPSC lines (Extended Data Fig. 1a, Extended Data Fig. 2c, d) and/or flow cytometric demonstration of transduction with mutant transgenes (Extended Data Fig. 2i) | Yes (HSPCs derived from genetically unmodified normal iPSCs through the in vitro differentiation protocol used in the study are not engraftable.)            | No                                                      |
| #2    | <b>CB CD34+ HSPCs after extended in vitro culture</b>                                                     | Fig. 1c-h, 2a-c, 4g-i and Extended Data Fig. 3                       | 20-65% engraftment 6-8 weeks post-transplantation (end point determined by lethality) of CD33+ immature blasts (Fig. 1d-h and Extended Data Fig. 3b, d-f)                                                                            | Triple-transduced SA+R (Extended Data Fig. 3a,c)                                                                                                                                                               | Yes (CB HSPCs are minimally engraftable under the experimental conditions used in the study, i.e. 11 days of in vitro culture in standard serum-free media.) | Yes (Fig. 1e, 4h and Extended Data Fig. 3e)             |
| #3    | <b>Sorted CMPs and GMPs from CB CD34+ cells</b>                                                           | Fig. 2g-i and Extended Data Fig. 5                                   | Up to 50% engraftment 6-13 weeks post-transplantation (end point determined by lethality) of CD33+ immature blasts (Extended Data Fig. 5f, i-k) and secondary engraftment (Extended Data Fig. 5g, h)                                 | Triple-transduced SA+R or SAR (Extended Data Fig. 5d, e, l)                                                                                                                                                    | Yes (Sorted GMPs and CMPs are committed progenitors with limited short-term engraftment potential. See also Extended Data Fig. 5i,j)                         | Yes (Fig. 2g, h)                                        |
| #4    | <b>CD34+ HSPCs from patient-derived AML-iPSC lines</b> (AML-4.24, AML-4.10, AML-47.1, AML-37.16, AML-9.9) | Figs 3a-d, 4e,f 5f,g and Extended Data Fig. 7a,e, 8c-f, 9a-e and 10g | Up to 99% engraftment 3-16 weeks post-transplantation of CD33+ immature blasts (Fig. 3a-d, Extended Data Fig. 7a and previously reported in PMID: 28215825, PMID: 32492433 and PMID: 37067914)                                       | HSPCs derived from clonal iPSC lines with AML driver mutations (PMID: 28215825, PMID: 32492433 and PMID: 37067914)                                                                                             | Yes (HSPCs derived from genetically unmodified normal iPSCs through the in vitro differentiation protocol used in the study are not engraftable.)            | Yes (PMID: 28215825, PMID: 32492433 and PMID: 37067914) |

**Supplementary Table 1. Summary of in vivo leukemic features of all models used in this study.**

**a. Monocytic/Non-monocytic AML cohort**

| Patient characteristics | Monocytic AML (N=31) | Non-monocytic AML (N=87) | P    |
|-------------------------|----------------------|--------------------------|------|
| Age, years              | 72 (64-85)           | 72 (49-89)               | .319 |
| Male sex                | 15 (48)              | 49 (56)                  | .446 |
| ECOG PS ≥2              | 12 (39)              | 20 (23)                  | .091 |
| PB blasts, %            | 3 (0-59)             | 11 (0-91)                | .012 |
| BM blasts, %            | 40 (8-83)            | 36 (2-90)                | .195 |
| Diagnosis               |                      |                          |      |
| De novo AML             | 17 (55)              | 40 (46)                  | .397 |
| sAML with AHD           | 8 (26)               | 36 (41)                  | .124 |
| Untreated AHD           | 5 (16)               | 11 (13)                  |      |
| Therapy for AHD         | 3 (10)               | 25 (29)                  | .089 |
| t-AML                   | 6 (19)               | 15 (17)                  | .069 |
| FAB type                |                      |                          |      |
| M0                      |                      | 11 (13)                  | NA   |
| M1                      |                      | 18 (21)                  |      |
| M2                      |                      | 31 (36)                  |      |
| M4                      | 18 (58)              |                          |      |
| M5                      | 8 (26)               |                          |      |
| M6                      |                      | 3 (3)                    |      |
| M7                      |                      | 2 (2)                    |      |
| RAEB-T                  | 5 (16)               | 22 (25)                  |      |
| ELN 2017 CG risk        |                      |                          |      |
| Favorable               | 0 (0)                | 0 (0)                    | .291 |
| Intermediate            | 19 (61)              | 41 (47)                  |      |
| Adverse                 | 11 (35)              | 46 (53)                  |      |
| Complex CG              | 8 (26)               | 36 (41)                  |      |
| Mutations               |                      |                          |      |
| <i>NPM1</i>             | 14 (45)              | 14 (16)                  | .001 |
| <i>FLT3-ITD/TKD</i>     | 8 (26)               | 10 (11)                  | .057 |
| <i>IDH1/2</i>           | 8 (26)               | 16 (18)                  | .378 |
| <i>TP53</i>             | 6 (19)               | 30 (34)                  | .116 |
| <i>RUNX1</i>            | 6 (19)               | 15 (17)                  | .792 |
| <i>ASXL1</i>            | 4 (13)               | 16 (18)                  | .484 |
| <i>K/NRAS</i>           | 6 (19)               | 20 (23)                  | .675 |
| ELN 2017 risk group     |                      |                          |      |
| Favorable               | 12 (39)              | 14 (16)                  | .030 |
| Intermediate            | 4 (13)               | 12 (14)                  |      |
| Adverse                 | 15 (48)              | 61 (70)                  |      |

**b. Extended cohort**

| Patient characteristics | N (%)      |
|-------------------------|------------|
| Age, years              | 72 (49-89) |
| Male sex                | 78 (57)    |
| ECOG PS ≥2              | 43 (31)    |
| PB blasts, %            | 8 (0-91)   |
| BM blasts, %            | 24 (20-81) |
| Diagnosis               |            |
| De novo AML             | 63 (46)    |
| sAML with AHD           | 51 (37)    |
| Untreated AHD           | 20 (15)    |
| Therapy for AHD         | 31 (23)    |
| t-AML                   | 23 (17)    |
| ELN 2022 CG risk        |            |
| Favorable               | 0 (0)      |
| Intermediate            | 74 (54)    |
| Adverse                 | 63 (46)    |
| Mutations               |            |
| <i>NPM1</i>             | 29 (21)    |
| <i>FLT3-ITD/TKD</i>     | 11 (8)     |
| <i>IDH1/2</i>           | 29 (21)    |
| <i>TP53</i>             | 42 (31)    |
| <i>RUNX1</i>            | 23 (17)    |
| <i>ASXL1</i>            | 29 (21)    |
| <i>K/NRAS</i>           | 31 (23)    |
| ELN 2022 risk group     |            |
| Favorable               | 11 (8)     |
| Intermediate            | 17 (12)    |
| Adverse                 | 109 (80)   |

All results expressed as number (%) or median (range). ECOG PS: Eastern Cooperative Oncology Group performance status; ELN: European LeukemiaNet; AML: acute myeloid leukemia; PB: peripheral blood; BM: bone marrow; sAML: secondary AML; AHD: antecedent hematologic disorder; AML; t-AML: therapy-related AML; FAB: French American British; RAEB-T: refractory anemia with excess blasts in transformation; CG: cytogenetics

**Supplementary Table 5.** Baseline characteristics of patients with newly diagnosed monocytic and non-monocytic AML, shown in Fig. 4a,b, treated with 10-day DEC and VEN (NCT03404193) (a) and of an extended cohort including the same patients and additional 19 patients enrolled since prior data cut-off with longer follow-up, shown in Fig. 4c,d and Extended Data Fig. 8a,b. (Information on monocytic differentiation status is not available for the additional patients enrolled after the prior data cut-off.)

| Outcomes                 | Monocytic AML (N=31) | Non-monocytic AML (N=87) | P    | Extended cohort (N=137) |
|--------------------------|----------------------|--------------------------|------|-------------------------|
| Overall response rate    | 27 (87)              | 70 (80)                  | .407 | 110 (80)                |
| CR                       | 16 (52)              | 43 (49)                  | .650 | 74 (54)                 |
| CRi                      | 8 (26)               | 16 (18)                  |      | 22 (16)                 |
| MLFS                     | 3 (10)               | 11 (13)                  |      | 14 (10)                 |
| No response              | 3 (10)               | 16 (18)                  |      | 23 (17)                 |
| Inevaluable / Aplasia    | 1 (3)                | 1 (1)                    |      | 4 (3)                   |
| MRD negative by FCM      | 16/27 (59)           | 36/67 (54)               | .626 | 63 (46)                 |
| Relapse                  | 10/27 (37)           | 29/70 (41)               | .693 | 56 (41)                 |
| 30-day mortality         | 0 (0)                | 2 (2)                    | 1.00 | 5 (4)                   |
| 60-day mortality         | 3 (10)               | 9 (10)                   | .916 | 18 (13)                 |
| No of cycles to response | 1 (1-4)              | 1 (1-4)                  | .535 | 1 (1-5)                 |
| SCT after response       | 3 (10)               | 13 (15)                  | .375 | 24 (18)                 |

All results expressed as number (%) or median (range). CR=complete remission, CRi = CR with incomplete hematologic recovery; MLFS: morphologic leukemia-free state; MRD = measurable residual disease; FCM = flow cytometry; SCT = allogeneic stem cell transplantation

**Supplementary Table 6.** Outcomes of patients with newly diagnosed AML treated with 10-day DEC and VEN.

## Supplementary Discussion (Extended discussion)

Here we provide evidence that the LSCs sustaining RAS-MT subclones in AML originate from GMPs. Previous mouse modeling studies have shown that committed progenitors can be or need to be the target cells of transformation in AML<sup>1,2</sup>. Previous studies have also shown the existence of GMP-like LSCs in human AML<sup>3</sup>. While our studies do not exclude that RAS mutations may also originate in a more primitive HSC/MPP that can give rise to GMP LSCs in some AML cases, they firmly establish that GMPs can be the target cell from which RAS-MT LSCs originate. We thus demonstrate that the subclonal RAS-mutated AML LSC can emerge from a different and more mature cell type than the cell-of-origin of the major AML clone, which in most cases is a primitive HSC/MPP (Extended Data Fig. 10h and Extended Data Fig. 11a). Importantly, this has far-reaching implications in the clinic.

Our data strongly point to monocytic differentiation and VEN resistance being two independent effects with a common cause, RAS mutations. This can explain the observed associations between monocytic AML and VEN resistance in some studies but not others. In addition, we show here that leukemic transformation by RAS mutations is dependent on the cellular milieu and chromatin landscape, whereas VEN resistance is conferred more broadly in all HSPC types by RAS mutations, again pointing to different mechanistic underpinnings of these processes.

Our data thus shed new light on recent observations related to clinical responses to VEN in AML. While we confirm that mature monocytes are resistant to VEN, in agreement with previous findings<sup>4</sup>, we show that this resistance at the cellular level has no impact on the clinical outcome, which is instead determined by the response of LSCs (Extended Data Fig. 11a,b). This is in line with a large body of evidence showing that the targeting of LSCs is essential to achieving lasting therapeutic responses in AML, while the sensitivity or lack thereof of the more mature AML cells to therapeutic agents is not consequential to the long-term clinical outcome<sup>5-7</sup>. In addition, in view of our data, the monocytic subclones that have been observed to outgrow and be selected upon VEN treatment in patients are likely to, at least in many of the cases, correspond to RAS-MT subclones<sup>4,8,9</sup>. Since RAS-MT AML subclones contain a higher fraction of monocytic cells than antecedent RAS-WT clones, selection of the RAS-MT subclone at the LSC level can give the appearance of an expansion of cells with monocytic features upon relapse or resistance, with the latter being an epiphenomenon and not causative to the relapse or resistance (Extended Data Fig. 11c). Recently identified “monocytic LSCs” shown to generate monocytic AML, to have a distinct transcriptome and to downregulate BCL2, may also conceivably correspond, at least in a fraction of the cases, to RAS-MT LSCs<sup>4,9</sup>. The association of monocytic features with poor outcomes after VEN therapy in some cohorts<sup>4,8</sup> vs lack of association in others<sup>10,11</sup>, including the one we present here, may be explained by variable degrees of enrichment of the respective monocytic cohorts in AML cases with RAS mutations. Thus our findings can synthesize and reconcile previous seemingly contradictory observations into a coherent model.

Our findings have important implications for clinical practice. The resistance of *N/KRAS*-MT LSCs to VEN implies that combination therapy with VEN may have limited benefit for patients with preexisting *N/KRAS* mutations and may even accelerate disease progression by promoting the growth of the *N/KRAS*-MT subclone (Fig. 4g-i and Extended Data Fig. 11c). Consistent with this, we recently reported rapid selection of RAS-MT subclones in AML patients treated with VEN<sup>12</sup>. Our findings also provide strong rationale for combining VEN with MCL1 inhibitors and potentially BCL-xL inhibitors, as frontline therapy in patients with detectable RAS mutations or all eligible patients<sup>13,14</sup>. However, the development of MCL1 and BCL-xL inhibitors has been hampered by on-target dose-limiting toxicities.

The emergence of VEN resistance has also been associated with other progression mutations in AML, such as FLT3 and TP53 mutations<sup>15,16</sup>. FLT3-ITD has been shown to induce higher expression of MCL1 and BCL-xL<sup>17,18</sup>. It would be interesting to investigate whether LSCs harboring other progression mutations are, similarly to RAS-MT LSCs, resistant to VEN and have altered BCL2 family expression profiles. Consistent with our proposition that VEN resistance and monocytic differentiation are independent processes, FLT3-ITD mutations are not associated with monocytic differentiation, and, on the contrary, appear to give rise to more primitive leukemic blasts (Extended Data Fig. 7k)<sup>19-21</sup>.

The malignant cells in AML are the product of two orthogonal processes: one that stems from the clonal evolution of genetic clones and subclones through the sequential acquisition of driver genetic lesions; and one that arises from a differentiation hierarchy within each genetic clone and subclone wherein AML LSCs give rise to more differentiated progeny<sup>22</sup>. Our study shows how these intersect and impact each other, specifically how a specific cell differentiation state along the myeloid lineage is selected by mutant RAS as the target cell of transformation and how this, in turn, changes the hierarchical structure of the resulting leukemia to one more biased towards mature monocytic output. It has long been debated whether the phenotype of leukemic blasts is determined by the degree of differentiation of the LSC cell-of-origin or, alternatively, by the transforming event and its effects on the developmental program of the LSCs<sup>23</sup>. Our results propose a new paradigm, whereby the oncogenic event (i.e. RAS mutation) selects for a specific differentiation state of a progenitor cell (i.e. a GMP) that is the target cell of transformation, with the resulting blast phenotype (i.e. monocytic differentiation) being the result of the interaction between both the target cell type and the mutational event. Furthermore, importantly, we show that this interaction between the genetic and developmental AML hierarchy determines not only the phenotype, but also critical properties of the disease with far-reaching implications for its treatment. In view of our findings, more such dependencies between genetic and non-genetic determinants of AML pathogenesis are likely to exist that await discovery and can potentially inform clinical practice.

- 1 Krivtsov, A. V. *et al.* Transformation from committed progenitor to leukaemia stem cell  
initiated by MLL-AF9. *Nature* **442**, 818-822 (2006). <https://doi.org:10.1038/nature04980>
- 2 Ye, M. *et al.* Hematopoietic Differentiation Is Required for Initiation of Acute Myeloid  
Leukemia. *Cell Stem Cell* **17**, 611-623 (2015). <https://doi.org:10.1016/j.stem.2015.08.011>
- 3 Goardon, N. *et al.* Coexistence of LMPP-like and GMP-like leukemia stem cells in acute  
myeloid leukemia. *Cancer Cell* **19**, 138-152 (2011).  
<https://doi.org:10.1016/j.ccr.2010.12.012>
- 4 Pei, S. *et al.* Monocytic Subclones Confer Resistance to Venetoclax-Based Therapy in  
Patients with Acute Myeloid Leukemia. *Cancer Discov* **10**, 536-551 (2020).  
<https://doi.org:10.1158/2159-8290.CD-19-0710>
- 5 Pearce, D. J. *et al.* AML engraftment in the NOD/SCID assay reflects the outcome of  
AML: implications for our understanding of the heterogeneity of AML. *Blood* **107**, 1166-  
1173 (2006). <https://doi.org:10.1182/blood-2005-06-2325>
- 6 Eppert, K. *et al.* Stem cell gene expression programs influence clinical outcome in  
human leukemia. *Nat Med* **17**, 1086-1093 (2011). <https://doi.org:10.1038/nm.2415>
- 7 Ng, S. W. *et al.* A 17-gene stemness score for rapid determination of risk in acute  
leukaemia. *Nature* **540**, 433-437 (2016). <https://doi.org:10.1038/nature20598>
- 8 Zhang, H. *et al.* Integrated analysis of patient samples identifies biomarkers for  
venetoclax efficacy and combination strategies in acute myeloid leukemia. *Nat Cancer* **1**,  
826-839 (2020). <https://doi.org:10.1038/s43018-020-0103-x>
- 9 Pei, S. *et al.* A novel type of monocytic leukemia stem cell revealed by the clinical use of  
venetoclax-based therapy. *Cancer Discov* (2023). <https://doi.org:10.1158/2159-8290.CD-22-1297>
- 10 Stahl, M. *et al.* Clinical and molecular predictors of response and survival following  
venetoclax therapy in relapsed/refractory AML. *Blood Adv* **5**, 1552-1564 (2021).  
<https://doi.org:10.1182/bloodadvances.2020003734>
- 11 Waclawiczek, A. *et al.* Combinatorial BCL2 Family Expression in Acute Myeloid  
Leukemia Stem Cells Predicts Clinical Response to Azacitidine/Venetoclax. *Cancer  
Discov* **13**, 1408-1427 (2023). <https://doi.org:10.1158/2159-8290.CD-22-0939>
- 12 Zhang, Q. *et al.* Activation of RAS/MAPK pathway confers MCL-1 mediated acquired  
resistance to BCL-2 inhibitor venetoclax in acute myeloid leukemia. *Signal Transduct  
Target Ther* **7**, 51 (2022). <https://doi.org:10.1038/s41392-021-00870-3>
- 13 Carter, B. Z. *et al.* Maximal Activation of Apoptosis Signaling by Cotargeting  
Antiapoptotic Proteins in BH3 Mimetic-Resistant AML and AML Stem Cells. *Mol Cancer  
Ther* **21**, 879-889 (2022). <https://doi.org:10.1158/1535-7163.MCT-21-0690>
- 14 Caenepeel, S. *et al.* AMG 176, a Selective MCL1 Inhibitor, Is Effective in Hematologic  
Cancer Models Alone and in Combination with Established Therapies. *Cancer Discov* **8**,  
1582-1597 (2018). <https://doi.org:10.1158/2159-8290.CD-18-0387>
- 15 Ong, F., Kim, K. & Konopleva, M. Y. Venetoclax resistance: mechanistic insights and  
future strategies. *Cancer Drug Resist* **5**, 380-400 (2022).  
<https://doi.org:10.20517/cdr.2021.125>
- 16 Chyla, B. *et al.* Genetic Biomarkers Of Sensitivity and Resistance to Venetoclax  
Monotherapy in Patients With Relapsed Acute Myeloid Leukemia. *Am J Hematol* **93**,  
E202-205 (2018). <https://doi.org:10.1002/ajh.25146>
- 17 Yoshimoto, G. *et al.* FLT3-ITD up-regulates MCL-1 to promote survival of stem cells in  
acute myeloid leukemia via FLT3-ITD-specific STAT5 activation. *Blood* **114**, 5034-5043  
(2009). <https://doi.org:10.1182/blood-2008-12-196055>
- 18 Singh Mali, R. *et al.* Venetoclax combines synergistically with FLT3 inhibition to  
effectively target leukemic cells in FLT3-ITD+ acute myeloid leukemia models.  
*Haematologica* **106**, 1034-1046 (2021). <https://doi.org:10.3324/haematol.2019.244020>



- 19 van Galen, P. *et al.* Single-Cell RNA-Seq Reveals AML Hierarchies Relevant to Disease Progression and Immunity. *Cell* **176**, 1265-1281 e1224 (2019). <https://doi.org:10.1016/j.cell.2019.01.031>
- 20 Zeng, A. G. X. *et al.* A cellular hierarchy framework for understanding heterogeneity and predicting drug response in acute myeloid leukemia. *Nat Med* **28**, 1212-1223 (2022). <https://doi.org:10.1038/s41591-022-01819-x>
- 21 Kotini, A. G. *et al.* Patient-Derived iPSCs Faithfully Represent the Genetic Diversity and Cellular Architecture of Human Acute Myeloid Leukemia. *Blood Cancer Discov*, OF1-OF18 (2023). <https://doi.org:10.1158/2643-3230.BCD-22-0167>
- 22 Kreso, A. & Dick, J. E. Evolution of the cancer stem cell model. *Cell Stem Cell* **14**, 275-291 (2014). <https://doi.org:10.1016/j.stem.2014.02.006>
- 23 Wang, J. C. & Dick, J. E. Cancer stem cells: lessons from leukemia. *Trends Cell Biol* **15**, 494-501 (2005). <https://doi.org:10.1016/j.tcb.2005.07.004>
